# Supplementary material for: Worse Cardiovascular and Renal Outcome in Male SLE Patients: First Gender Study From the Swiss SLE Cohort Study
Source: Research Square preprint supplement (doi:10.21203/rs.3.rs-645732/v1), 2021-07-08
Supplement: Supplementary file 2 [file 8aae9cd0262cf3f562c791ec.docx]

Suppelemtary table 2: Logistic regression for any dermatological manifestations of SLE

|  | β | SE (β) | p-value | B |
| --- | --- | --- | --- | --- |
| Gender | -0,674 | 0,242 | 0,005 | 0,510 |
| disease duration | 0,022 | 0,012 | 0,072 | 1,022 |
| constant | 0,973 | 0,132 | <0,001 | 2,645 |

Supplementary table 2: Tables of estimates of multiple logistical regression models for dermatological manifestations of SLE. The model includes gender (male=1, female=0) and disease duration at inclusion in years. β = regression coefficient, SE (β) = standard error for β, B = odds ratio.
